# Supplementary material
Source: PubMed Central journal article supplement (PMC4696446)
Supplement: Supp_Fig1.pdf [file Supp_Fig1.pdf]

## Supplementary Data

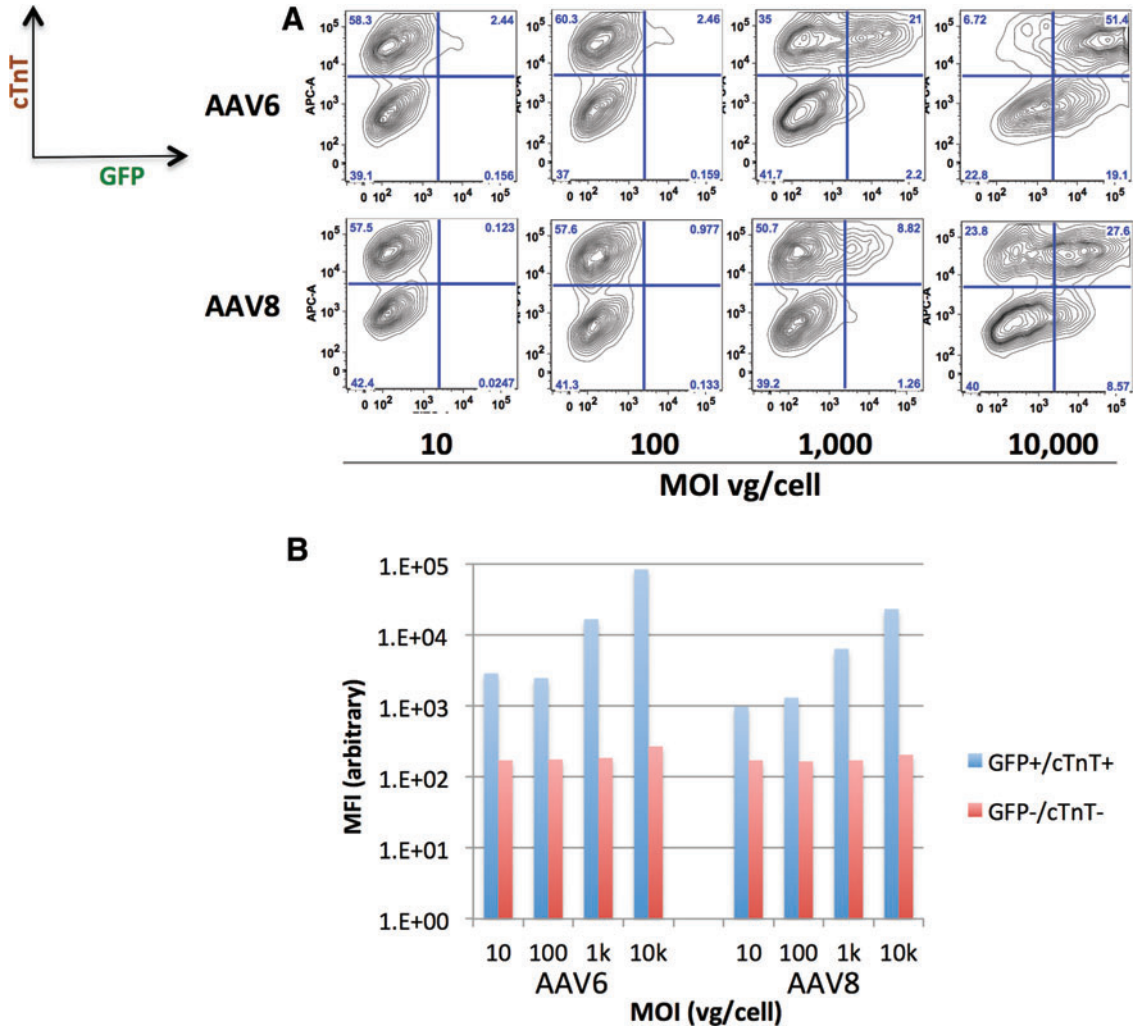

**Supplementary Figure S1.** Identification of the optimal MOI for serotype comparison. **(A)** FACS analysis of the cardiac differentiated iPSCs transduced with AAV6 and 8 expressing GFP. **(B)** Mean fluorescence intensity of GFP+/cTnT+ and GFP-/cTnT- populations. Y axis is in log scale. AAV, adeno-associated virus; cTnT, cardiac troponin T; FACS, fluorescence-activated cell sorting; GFP, green fluorescence protein; iPSCs, induced pluripotent stem cells; MOI, multiplicity of infection.
