# Supplementary material
Source: PubMed Central journal article supplement (PMC4696446)
Supplement: Supp_Fig2.pdf [file Supp_Fig2.pdf]

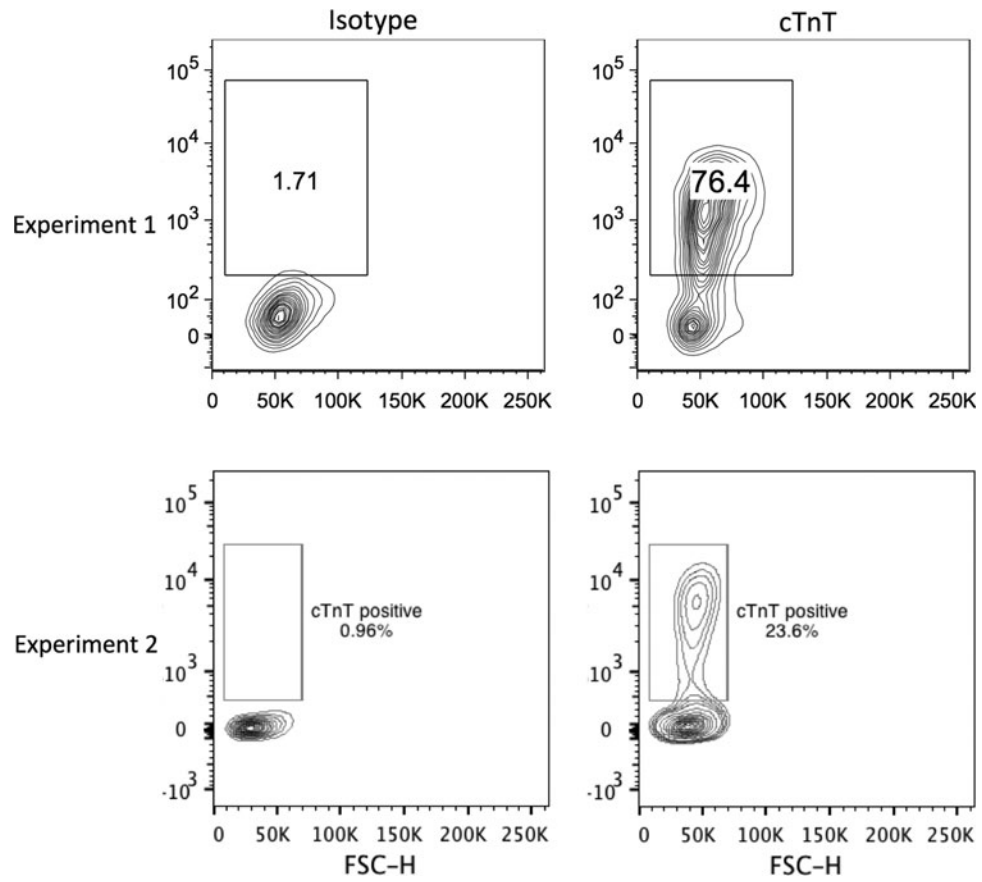

**Supplementary Figure S2.** Flow cytometry analysis of cardiac induction efficiency of two independent experiments.

---
